# Supplementary material
Source: HighWire-hosted journal article supplement (https://erj.ersjournals.com/content/52/5/1800951)
Supplement: inline-supplementary-material-1 [file inline-supplementary-material-1.pdf]

## **The Vitamin D Binding Protein axis modifies disease severity in Lymphangiomyomatosis**

**Authors:** Suzanne Miller<sup>1</sup>, Clare Coveney<sup>2</sup>, Janice Johnson<sup>1</sup>, Aliko-Eleni Farmaki<sup>3</sup>, Nishant Gupta<sup>4</sup>, Martin D. Tobin<sup>3,5</sup>, Louise V. Wain<sup>3,5</sup>, Francis X. McCormack<sup>4</sup>, David .J. Boocock<sup>2</sup> and Simon R. Johnson<sup>1,6</sup>.

### **Affiliations:**

<sup>1</sup>Division of Respiratory Medicine, University of Nottingham and National Institute for Health Research, Respiratory Biomedical Research Centre, Nottingham, United Kingdom.

<sup>2</sup>John van Geest Cancer Research Centre, Nottingham Trent University, Nottingham, United Kingdom.

<sup>3</sup>Department of Health Sciences, College of Life Sciences, University of Leicester, Leicester, United Kingdom.

<sup>4</sup>Division of Pulmonary, Critical Care and Sleep Medicine, University of Cincinnati, Ohio, USA.

<sup>5</sup>National Institute for Health Research Leicester Respiratory Biomedical Research Centre, Glenfield Hospital, Leicester, United Kingdom.

<sup>6</sup>National Centre for LAM, Queen's Medical Centre, Nottingham, United Kingdom.

### **Data supplement**

## Supplementary Methods

### **Patients and sample collection**

101 women with LAM and 22 healthy control women were recruited between 2011 and 2016 from the National Centre for LAM, Nottingham, UK, hence-forth termed the UK cohort. Ethical approval was obtained from the East Midlands Research Ethics Committee (13/EM/0264). For healthy controls, age and ethnicity were recorded. All subjects provided written informed consent. Clinical history, presence of TSC, angiomyolipoma, lymphatic disease, menopausal status and drug treatment were recorded. Lymphatic disease was defined as the presence of chylous collections in the chest or abdomen, lymphangioliomyomas or lymphadenopathy due to LAM visible on CT scanning of the chest abdomen and pelvis. Disease duration was calculated as the time from first symptom attributable to LAM as previously described<sup>7</sup>. Blood samples were taken at enrolment and processed within one hour of phlebotomy. Whole blood collected in serum separator tubes were allowed to clot for 1 hour at room temperature and separated by centrifugation at 1000 g for 10 minutes. Blood and serum samples were stored at -80 °C until analysis.

A second cohort of 243 subjects recruited between 1998 and 2001 in the National Heart Lung and Blood Institute (NHLBI) LAM Registry to study the natural history of LAM was used as a replication cohort and to study long term survival. This cohort has been described in detail previously<sup>18</sup>. Serum and DNA samples at enrolment, available from 152 of these 243 subjects, along with clinical and prospective lung function data were obtained from the National Disease Research Interchange who now curate the resource. Outcome data, either all-cause mortality or the need for lung transplant in the period following baseline assessment, were obtained by querying the United States National Death Index and the United Network for Organ Sharing databases. As data on the use of rapamycin was not available for this cohort, outcome data were censored at 2010 before rapamycin was widely used for the treatment of LAM in the USA. Suitable samples for serum protein measurement, genotyping or lung function over greater than one year's duration was not available in all subjects (Figure 1). The numbers included in individual analyses are stated in the results.

Lung function was measured at either Nottingham University Hospitals NHS Trust or the referring centre in the USA according to ERS/ATS standards. Prospective change in lung function was calculated as the difference between FEV<sub>1</sub> and DL<sub>CO</sub> measured at recruitment and last follow up visit expressed in ml/year for FEV<sub>1</sub> ( $\Delta$ FEV<sub>1</sub>) and as ml/min/kPa/yr for DL<sub>CO</sub> ( $\Delta$ DL<sub>CO</sub>). To reduce variation in measurement of disease progression, only values spanning one year or longer were used for this analysis<sup>7</sup>. Classification into stable or progressive disease at presentation was performed by calculating retrospective loss of FEV<sub>1</sub> until the time of enrolment between the first recorded FEV<sub>1</sub> value and the FEV<sub>1</sub> at study enrolment divided by the time interval and expressed in ml/year. Those with a retrospective  $\Delta$ FEV<sub>1</sub> of less than -50 ml/yr were arbitrarily classified as more stable and greater than -50 ml/yr as more progressive.

Fifty women with LAM from the UK cohort who had not been treated with rapamycin formed the initial proteomic discovery population. A further 27 untreated patients from the UK were used as a replication cohort and 24 who were receiving rapamycin for treatment of LAM at recruitment were also studied (Table 1). The discovery cohort was subdivided into those with stable and more progressive disease based upon retrospective loss of lung function.

## Proteomics

Serum was diluted and filtered at 2  $\mu\text{m}$  to remove any particulates to a final 1 in 45 dilution in 100 mM Triethylammonium bicarbonate buffer. An alkylation and reduction step adding 2  $\mu\text{L}$  0.5 mM Dithiothreitol (DTT) with 45 min shaking at 56  $^{\circ}\text{C}$  followed by 7.15  $\mu\text{L}$  of 140 mM Iodoacetamide and 30 min incubation in darkness at room temperature. The reaction was then quenched using 1.95  $\mu\text{L}$  of 0.5 mM DTT. Samples were digested with 1.95  $\mu\text{L}$  of 1  $\mu\text{g}/\mu\text{L}$  trypsin (T656720UG, Sigma, UK) over 17 hrs at 37 $^{\circ}\text{C}$  while shaking/agitating after which samples were lyophilised in a speed vac and re-suspended at decreasing concentrations of acetonitrile (ACN) to a final mixture of 40  $\mu\text{L}$  and 5% ACN 0.1% formic acid (FA). After high speed centrifugation, supernatants were transferred to appropriate tubes for mass spectrometric analysis. The Biognosis HRM retention time standard was added for downstream alignment. Samples were analysed on a SCIEX TripleTOF 6600 mass spectrometer hyphenated to an Eksigent nanoLC 425 system operating in micro flow (5  $\mu\text{L}/\text{min}$ ). The SCIEX SWATH mass spectrometric workflow<sup>17</sup> was utilised for relative protein quantitation, wherein data acquired from a quantitative data independent (DIA) SWATH, are assembled against libraries of protein identified using a data dependent acquisition. Chromatographic separation for protein identification (Information Dependent Acquisition/IDA) was over an 87 min gradient, 4  $\mu\text{L}$  direct injection on a YMC 25 cm x 0.3mm Triart-C18 column (12nm, 3 $\mu\text{m}$  particle size) with a gradient of 3 % mobile phase B (2% acetonitrile, 5% DMSO in 0.1% FA) to 30 % over 38 min; to 40% B at 73 min, 80 % B at 75 min, held for 3 min then returned to 3 % over 1 min. Chromatographic separation for SWATH runs was conducted as above but on a 57 min gradient of 3 % mobile phase B (2% ACN, 5% DMSO in 0.1% FA) to 30 % over 38 min; to 40 % B at 43 min, 80 % B at 45 min held for 3 min then returned to 3 % over 1 min. The mass spectrometer set up and method settings consisted of a Duospray™ source (SCIEX) with a 50  $\mu\text{m}$  electrode at +5500V (gas settings GS1 15; GS2 0; CUR 25; TEMP 0). IDA was carried out using parameters of Top 30 (TOFMS 250 ms accumulation time, production 60 ms, total cycle time 2.1 s); charge state 2 - 4 above a threshold of 200 cps; dynamic exclusion for 10 seconds using rolling collision energy (optimised for m/z of target ion). SWATH methods consisted of 100 variable windows optimised for serum and cell lysate proteins. MS/MS spectra were searched using ProteinPilot 5.0 (SCIEX) with the Swissprot human database (Jan 2015) at 1 % false discovery rate with an identification focus on biological modifications. SWATH data were aligned to the library files in PeakView (SCIEX) and uploaded to the SCIEX OneOmics platform for processing, compilation, assembly and annotation of SWATH data.

## Supplementary results

**Supplementary table E1. Serum proteins identified by proteomic screen in LAM and control serum.**

| <b>Protein Name</b> | <b>UniProt ID</b> | <b>Full name</b>                      |
|---------------------|-------------------|---------------------------------------|
| A1AG1               | P02763            | Alpha-1-acid glycoprotein 1           |
| A1AT                | P01009            | Alpha-1-antitrypsin                   |
| A1BG                | P04217            | Alpha-1B-glycoprotein                 |
| A2GL                | P02750            | Leucine-rich alpha-2-glycoprotein     |
| A2MG                | P01023            | Alpha-2-macroglobulin                 |
| ACTG                | P63261            | Actin, cytoplasmic 2                  |
| AFAM                | P43652            | Afamin                                |
| ALBU                | P02768            | Serum albumin                         |
| AMBP                | P02760            | Protein AMBP                          |
| ANGT                | P01019            | Angiotensinogen                       |
| ANT3                | P01008            | Antithrombin-III                      |
| APOA                | P08519            | Apolipoprotein(a)                     |
| APOA1               | P02647            | Apolipoprotein A-I                    |
| APOA2               | P02652            | Apolipoprotein A-II                   |
| APOA4               | P06727            | Apolipoprotein A-IV                   |
| APOB                | P04114            | Apolipoprotein B-100                  |
| APOC2               | P02655            | Apolipoprotein C-II                   |
| APOC3               | P02656            | Apolipoprotein C-III                  |
| APOD                | P05090            | Apolipoprotein D                      |
| APOE                | P02649            | Apolipoprotein E                      |
| APOF                | Q13790            | Apolipoprotein F                      |
| APOH                | P02749            | Beta-2-glycoprotein 1                 |
| APOL1               | O14791            | Apolipoprotein L1                     |
| APOM                | O95445            | Apolipoprotein M                      |
| C1QC                | P02747            | Complement C1q subcomponent subunit C |
| C1R                 | P00736            | Complement C1r subcomponent           |
| C1S                 | P09871            | Complement C1s subcomponent           |
| C4BPA               | P04003            | C4b-binding protein alpha chain       |
| CAMP                | P49913            | Cathelicidin antimicrobial peptide    |
| CBPN                | P15169            | Carboxypeptidase N catalytic chain    |
| CD44                | P16070            | CD44 antigen                          |
| CD5L                | O43866            | CD5 antigen-like                      |
| CERU                | P00450            | Ceruloplasmin                         |
| CFAB                | P00751            | Complement factor B                   |
| CFAH                | P08603            | Complement factor H                   |
| CFAI                | P05156            | Complement factor I                   |

|       |        |                                                            |
|-------|--------|------------------------------------------------------------|
| CLUS  | P10909 | Clusterin                                                  |
| CO2   | P06681 | Complement C2                                              |
| CO3   | P01024 | Complement C3                                              |
| CO4B  | P0COL5 | Complement C4-B                                            |
| CO5   | P01031 | Complement C5                                              |
| CO6   | P13671 | Complement component C6                                    |
| CO8A  | P07357 | Complement component C8 alpha chain                        |
| CO8G  | P07360 | Complement component C8 gamma chain                        |
| CO9   | P02748 | Complement component C9                                    |
| CXCL7 | P02775 | Platelet basic protein                                     |
| FA12  | P00748 | Coagulation factor XII                                     |
| FBLN1 | P23142 | Fibulin-1                                                  |
| FCG3A | P08637 | Low affinity immunoglobulin gamma Fc region receptor III-A |
| FCN2  | Q15485 | Ficolin-2                                                  |
| FETUA | P02765 | Alpha-2-HS-glycoprotein                                    |
| FHR3  | Q02985 | Complement factor H-related protein 3                      |
| FHR5  | Q9BXR6 | Complement factor H-related protein 5                      |
| FIBA  | P02671 | Fibrinogen alpha chain                                     |
| FINC  | P02751 | Fibronectin                                                |
| FOXP3 | O00409 | Forkhead box protein N3                                    |
| GELS  | P06396 | Gelsolin                                                   |
| H2AX  | P16104 | Histone H2AX                                               |
| HBA   | P69905 | Hemoglobin subunit alpha                                   |
| HBB   | P68871 | Hemoglobin subunit beta                                    |
| HDAC1 | Q13547 | Histone deacetylase 1                                      |
| HEMO  | P02790 | Hemopexin                                                  |
| HMMR  | O75330 | Hyaluronan mediated motility receptor                      |
| HPT   | P00738 | Haptoglobin                                                |
| HPTR  | P00739 | Haptoglobin-related protein                                |
| HRG   | P04196 | Histidine-rich glycoprotein                                |
| HS12B | Q96MM6 | Heat shock 70 kDa protein 12B                              |
| HS90B | P08238 | Heat shock protein HSP 90-beta                             |
| HV101 | P01742 | Immunoglobulin heavy variable 1-69                         |
| HV304 | P01765 | Immunoglobulin heavy variable 3-23                         |
| HV305 | P01766 | Immunoglobulin heavy variable 3-13                         |
| HV306 | P01767 | Immunoglobulin heavy variable 3-53                         |
| HV311 | P01772 | Immunoglobulin heavy variable 3-33                         |
| IBP3  | P17936 | Insulin-like growth factor-binding protein 3               |
| IC1   | P05155 | Plasma protease C1 inhibitor                               |
| IGHA1 | P01876 | Ig alpha-1 chain C region                                  |
| IGHA2 | P01877 | Ig alpha-2 chain C region                                  |
| IGHD  | P01880 | Ig delta chain C region                                    |
| IGHG1 | P01857 | Ig gamma-1 chain C region                                  |
| IGHG2 | P01859 | Ig gamma-2 chain C region                                  |
| IGHG3 | P01860 | Ig gamma-3 chain C region                                  |
| IGHM  | P01871 | Ig mu chain C region                                       |

|       |        |                                                                                |
|-------|--------|--------------------------------------------------------------------------------|
| IGJ   | P01591 | Immunoglobulin J chain                                                         |
| IGKC  | P01834 | Ig kappa chain C region                                                        |
| IGLL5 | B9A064 | Immunoglobulin lambda-like polypeptide 5                                       |
| ITIH1 | P19827 | Inter-alpha-trypsin inhibitor heavy chain H1                                   |
| ITIH2 | P19823 | Inter-alpha-trypsin inhibitor heavy chain H2                                   |
| ITIH4 | Q14624 | Inter-alpha-trypsin inhibitor heavy chain H4                                   |
| K1024 | Q9UPX6 | UPF0258 protein KIAA1024                                                       |
| K1C19 | P08727 | Keratin, type I cytoskeletal 19                                                |
| KANK3 | Q6NY19 | KN motif and ankyrin repeat domain-containing protein 3                        |
| KCNC4 | Q03721 | Potassium voltage-gated channel subfamily C member 4                           |
| KI67  | P46013 | Proliferation marker protein Ki-67                                             |
| KIFC2 | Q96AC6 | Kinesin-like protein KIFC2                                                     |
| KLKB1 | P03952 | Plasma kallikrein                                                              |
| KNG1  | P01042 | Kininogen-1                                                                    |
| KV102 | P01594 | Immunoglobulin kappa variable 1-33                                             |
| KV106 | P01598 | Immunoglobulin kappa variable 1-5                                              |
| KV305 | P01623 | Immunoglobulin kappa variable 3-20                                             |
| KV308 | P04207 | Immunoglobulin kappa variable 3-15                                             |
| KV309 | P04433 | Immunoglobulin kappa variable 3-11                                             |
| KV404 | P06314 | Immunoglobulin kappa variable 4-1                                              |
| LAC2  | P0CG05 | Ig lambda-2 chain C regions                                                    |
| LG3BP | Q08380 | Galectin-3-binding protein                                                     |
| LIPB2 | Q8ND30 | Liprin-beta-2                                                                  |
| LV106 | P04208 | Immunoglobulin lambda variable 1-47                                            |
| LV302 | P80748 | Immunoglobulin lambda variable 3-21                                            |
| LV403 | P01717 | Immunoglobulin lambda variable 3-25                                            |
| PEDF  | P36955 | Pigment epithelium-derived factor                                              |
| PGRP2 | Q96PD5 | N-acetylmuramoyl-L-alanine amidase                                             |
| PK3CG | P48736 | Phosphatidylinositol 4,5-bisphosphate 3-kinase catalytic subunit gamma isoform |
| PLF4  | P02776 | Platelet factor 4                                                              |
| PLMN  | P00747 | Plasminogen                                                                    |
| PON1  | P27169 | Serum paraoxonase/arylesterase 1                                               |
| PROP  | P27918 | Properdin                                                                      |
| PROS  | P07225 | Vitamin K-dependent protein S                                                  |
| RET4  | P02753 | Retinol-binding protein 4                                                      |
| SAA4  | P35542 | Serum amyloid A-4 protein                                                      |
| SHBG  | P04278 | Sex hormone-binding globulin                                                   |
| SHC1  | P29353 | SHC-transforming protein 1                                                     |
| THRB  | P00734 | Prothrombin                                                                    |
| TRFE  | P02787 | Serotransferrin                                                                |
| TRPV2 | Q9Y5S1 | Transient receptor potential cation channel subfamily V member 2               |
| TSP1  | P07996 | Thrombospondin-1                                                               |
| VTDB  | P02774 | Vitamin D-binding protein                                                      |
| VTNC  | P04004 | Vitronectin                                                                    |

**Supplementary table E2. Comparison of protein expression between women with LAM and control women.**

| Protein | UniProt ID | LAM vs control     |            |
|---------|------------|--------------------|------------|
|         |            | Fold change (Log2) | Confidence |
| VTDB    | P02774     | -2.6               | 0.65       |
| ITIH4   | Q14624     | -0.5               | 0.34       |
| HMMR    | O75330     | 0.5                | 0.31       |
| FETUA   | P02765     | -2.8               | 0.30       |
| AMBP    | P02760     | -0.5               | 0.28       |
| TRFE    | P02787     | -2.0               | 0.22       |
| ALBU    | P02768     | 0.5                | 0.21       |
| FIBA    | P02671     | -0.4               | 0.17       |
| ITIH2   | P19823     | 0.5                | 0.16       |
| IGHG3   | P01860     | 3.1                | 0.16       |
| SAA4    | P35542     | 0.7                | 0.15       |
| KI67    | P46013     | -1.3               | 0.15       |
| HEMO    | P02790     | 0.5                | 0.13       |
| APOL1   | O14791     | -0.5               | 0.13       |
| VTNC    | P04004     | -0.5               | 0.12       |
| APOA1   | P02647     | 0.8                | 0.12       |
| CERU    | P00450     | -0.5               | 0.12       |
| CXCL7   | P02775     | -0.5               | 0.12       |
| GELS    | P06396     | 2.1                | 0.12       |
| LV106   | P04208     | -1.0               | 0.11       |
| CFAB    | P00751     | -0.5               | 0.11       |
| KIFC2   | Q96AC6     | 1.7                | 0.10       |
| A1AT    | P01009     | -0.6               | 0.09       |
| CO2     | P06681     | -0.5               | 0.09       |
| CFAH    | P08603     | -0.3               | 0.09       |
| APOH    | P02749     | 2.8                | 0.09       |
| THRB    | P00734     | -0.3               | 0.08       |
| CO3     | P01024     | -0.3               | 0.08       |
| IGHM    | P01871     | 0.6                | 0.08       |
| CBPN    | P15169     | -0.4               | 0.08       |
| IGHA1   | P01876     | -0.7               | 0.07       |
| CLUS    | P10909     | 0.3                | 0.07       |
| C4BPA   | P04003     | 0.5                | 0.07       |
| KNG1    | P01042     | 0.3                | 0.07       |
| TRPV2   | Q9Y5S1     | -1.0               | 0.06       |
| PK3CG   | P48736     | -1.2               | 0.06       |
| CD5L    | O43866     | 2.4                | 0.05       |
| KV106   | P01598     | -1.4               | 0.05       |
| IGJ     | P01591     | -0.5               | 0.05       |
| APOA2   | P02652     | 0.3                | 0.05       |

|       |        |      |      |
|-------|--------|------|------|
| A2MG  | P01023 | 4.0  | 0.05 |
| HRG   | P04196 | 0.4  | 0.05 |
| AFAM  | P43652 | 0.4  | 0.05 |
| LAC2  | P0CG05 | -3.0 | 0.05 |
| APOA4 | P06727 | 0.4  | 0.05 |
| LV302 | P80748 | 0.5  | 0.05 |
| A2GL  | P02750 | 0.8  | 0.05 |
| CO4B  | P0COL5 | 2.3  | 0.05 |
| APOA  | P08519 | -1.1 | 0.05 |
| APOD  | P05090 | -0.4 | 0.05 |
| HBA   | P69905 | 0.9  | 0.05 |
| PLMN  | P00747 | -0.3 | 0.04 |
| HV101 | P01742 | -2.0 | 0.04 |
| KV309 | P04433 | 0.5  | 0.04 |
| KV102 | P01594 | 0.4  | 0.04 |
| IC1   | P05155 | 0.5  | 0.04 |
| CO8A  | P07357 | -0.3 | 0.04 |
| PROS  | P07225 | 0.4  | 0.04 |
| IGKC  | P01834 | 0.5  | 0.04 |
| PON1  | P27169 | 0.9  | 0.04 |
| SHC1  | P29353 | 0.3  | 0.04 |
| HPT   | P00738 | 1.1  | 0.04 |
| IBP3  | P17936 | -0.5 | 0.04 |
| RET4  | P02753 | -0.7 | 0.03 |
| HDAC1 | Q13547 | -0.4 | 0.03 |
| C1S   | P09871 | 0.2  | 0.03 |
| C1QC  | P02747 | 0.4  | 0.03 |
| KCNC4 | Q03721 | -0.9 | 0.03 |
| CAMP  | P49913 | -0.5 | 0.03 |
| LG3BP | Q08380 | -0.7 | 0.03 |
| ANT3  | P01008 | -0.3 | 0.03 |
| A1AG1 | P02763 | 0.8  | 0.03 |
| H2AX  | P16104 | -1.2 | 0.03 |
| FA12  | P00748 | -0.6 | 0.03 |
| PROP  | P27918 | -0.5 | 0.03 |
| CFAI  | P05156 | -0.3 | 0.03 |
| A1BG  | P04217 | 0.3  | 0.03 |
| IGLL5 | B9A064 | 0.5  | 0.03 |
| IGHG1 | P01857 | -0.7 | 0.02 |
| CO9   | P02748 | -0.3 | 0.02 |
| ACTG  | P63261 | -0.8 | 0.02 |
| HBB   | P68871 | 0.9  | 0.02 |
| APOB  | P04114 | -0.5 | 0.02 |
| APOC3 | P02656 | -0.4 | 0.02 |
| FINC  | P02751 | -0.3 | 0.02 |
| IGHD  | P01880 | -1.0 | 0.02 |



|       |        |      |      |
|-------|--------|------|------|
| FBLN1 | P23142 | -0.5 | 0.02 |
| APOC2 | P02655 | 0.5  | 0.02 |
| PGRP2 | Q96PD5 | -0.4 | 0.02 |
| APOF  | Q13790 | -0.7 | 0.02 |
| ITIH1 | P19827 | 0.5  | 0.02 |
| FCN2  | Q15485 | 0.5  | 0.02 |
| FHR3  | Q02985 | 0.6  | 0.01 |
| KANK3 | Q6NY19 | -0.9 | 0.01 |
| FCG3A | P08637 | -0.5 | 0.01 |
| ANGT  | P01019 | -0.4 | 0.01 |
| HV311 | P01772 | -0.6 | 0.01 |
| C1R   | P00736 | -0.7 | 0.01 |
| APOE  | P02649 | 0.4  | 0.01 |
| CO6   | P13671 | -0.7 | 0.01 |
| HS12B | Q96MM6 | -0.3 | 0.01 |
| APOM  | O95445 | 0.2  | 0.01 |
| IGHA2 | P01877 | 0.3  | 0.01 |
| TSP1  | P07996 | 0.5  | 0.01 |
| IGHG2 | P01859 | 0.9  | 0.01 |
| SHBG  | P04278 | -0.8 | 0.01 |
| K1024 | Q9UPX6 | -0.4 | 0.01 |
| LV403 | P01717 | -0.2 | 0.01 |
| HPTR  | P00739 | -0.6 | 0.01 |
| FOXN3 | O00409 | 0.7  | 0.01 |
| KLKB1 | P03952 | -0.9 | 0.01 |
| CO5   | P01031 | -0.6 | 0.01 |
| HS90B | P08238 | -0.6 | 0.01 |
| HV304 | P01765 | -0.6 | 0.01 |
| HV305 | P01766 | 0.6  | 0.01 |
| PLF4  | P02776 | -0.2 | 0.00 |
| KV305 | P01623 | 0.7  | 0.00 |
| PEDF  | P36955 | 0.6  | 0.00 |

Protein differences are expressed as fold change ranked by significance.

**Supplementary table E3. GC allele frequencies in control women, UK and NHLBI LAM cohorts**

| Genotype      | Cohort   |        |           |        | p value               |                          |                         |
|---------------|----------|--------|-----------|--------|-----------------------|--------------------------|-------------------------|
|               | Controls | UK LAM | NHLBI LAM |        | control vs.<br>UK LAM | control vs.<br>NHLBI LAM | UK LAM vs.<br>NHLBI LAM |
| n             | 168141   | 65     | rs7041    | rs4588 |                       |                          |                         |
|               |          |        | 145       | 146    |                       |                          |                         |
| <b>rs7041</b> |          |        |           |        |                       |                          |                         |
| GG            | 31       | 22     | 37        | -      | 0.076                 | 0.29                     | 0.075                   |
| GT            | 50       | 49     | 43        |        |                       |                          |                         |
| TT            | 19       | 29     | 20        |        |                       |                          |                         |
| <b>rs4588</b> |          |        |           |        |                       |                          |                         |
| AA            | 8        | 14     | -         | 8      | 0.20                  | 0.17                     | 0.43                    |
| AC            | 42       | 34     |           | 34     |                       |                          |                         |
| CC            | 50       | 52     |           | 58     |                       |                          |                         |

Percentage allele frequencies are shown for women of European ancestry in the three cohorts. Allele frequencies were compared using the Chi-squared test.

Supplementary figures

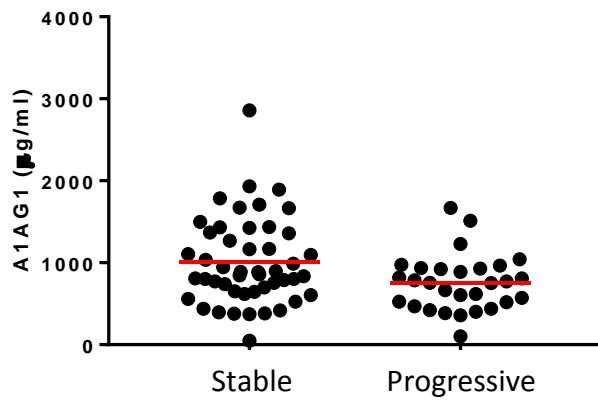

**Supplementary figure E1. Relationship between serum Alpha1-acid glycoprotein (A1AG1) and disease activity.** Serum A1AG1 of women with stable LAM is significantly higher than those with progressive disease ( $p=0.01$ ).

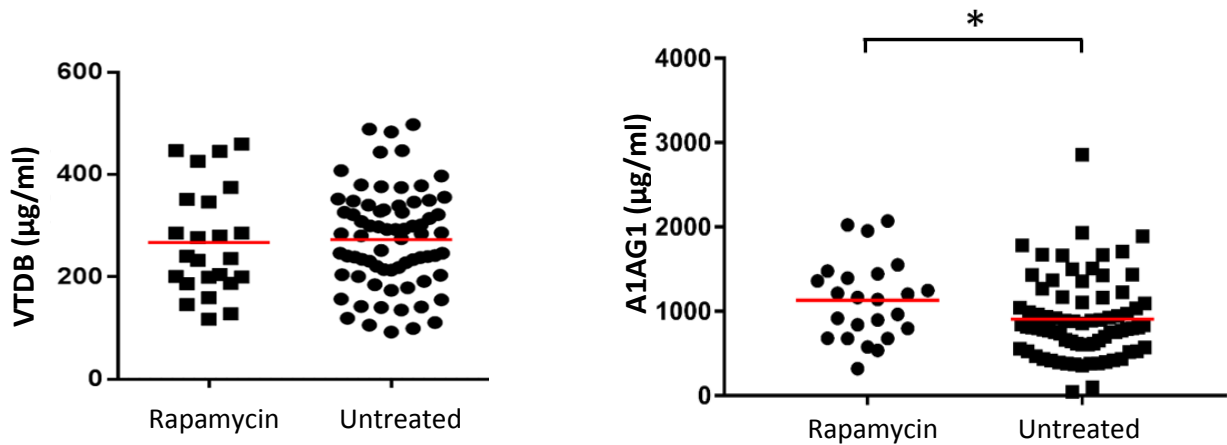

**Supplementary figure E2. Serum Vitamin D Binding Protein (VTDB) levels in patients with LAM untreated or treated with rapamycin.** Serum A1AG1 levels in rapamycin treated LAM compared with untreated LAM, ( $*p=0.031$ ).

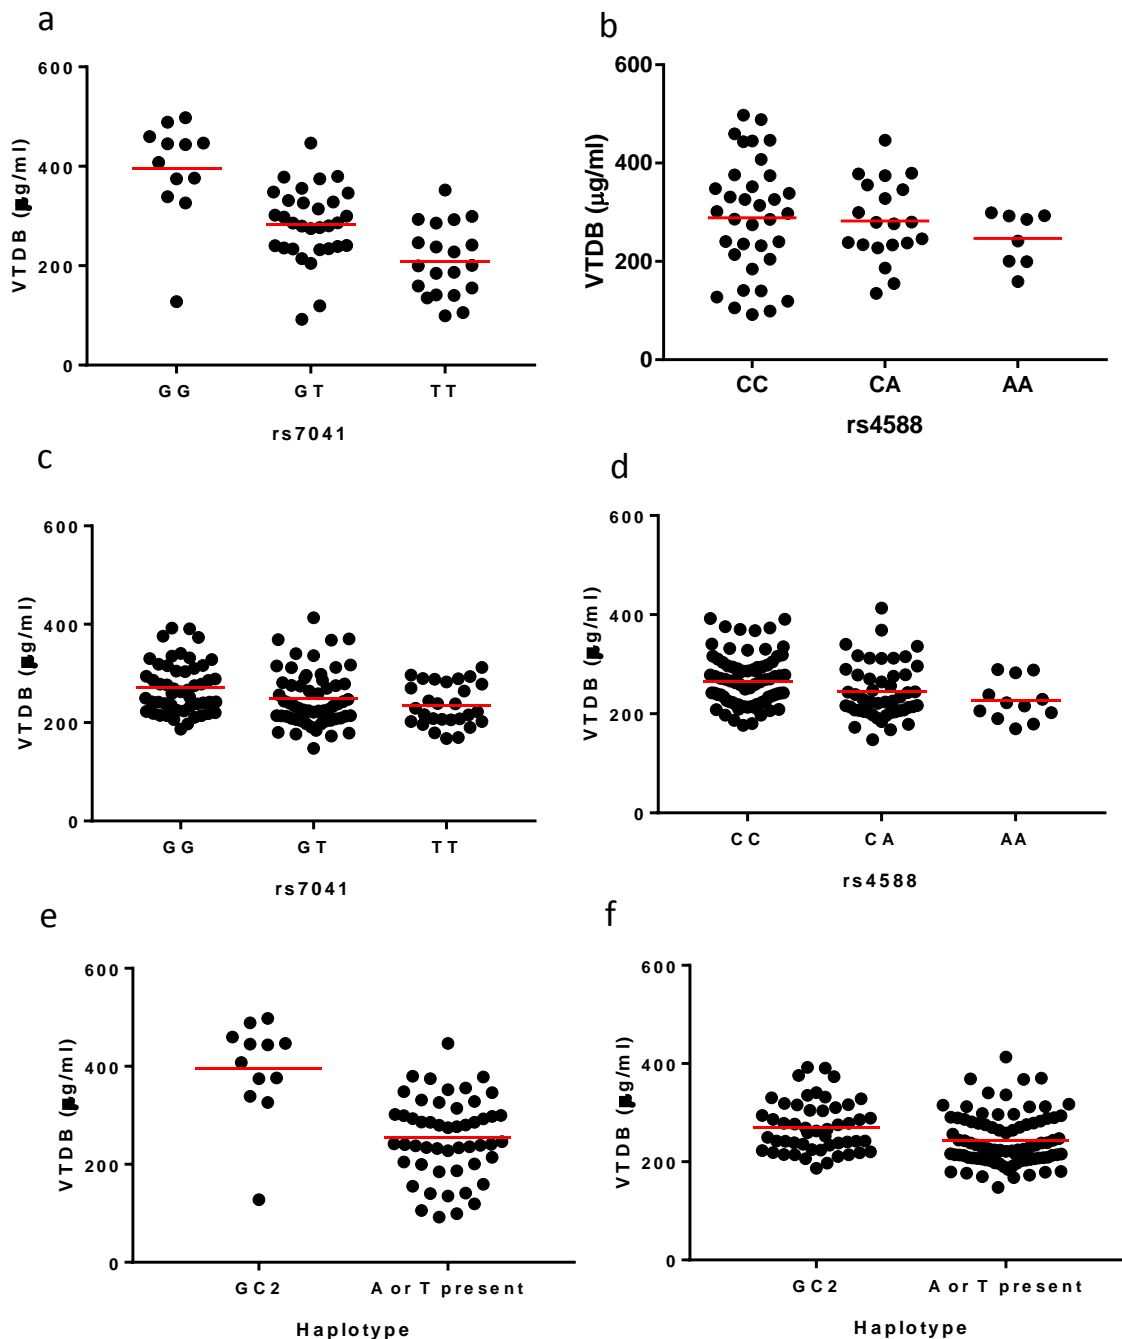

**Supplementary figure E3. Relationship between GC genotype and serum VTDB.** In the UK LAM cohort, the presence of the T allele at rs7041 was dose dependently associated with lower serum VTDB levels ( $n=63$ ,  $p<0.0001$ , panel a) although rs4588 was not associated with serum VTDB level ( $p=0.57$ , panel b). In the NHLBI Registry cohort, the T allele at rs7041 and the A allele at rs4588 were dose dependently associated with lower serum VTDB levels ( $n=139$ ,  $p=0.010$  and  $n=140$ ,  $p=0.035$  respectively, panels c and d). Haplotype analysis combining the allelic information at both SNPs showed the presence of the minor alleles at either rs7041 or rs4588 (T and A respectively) were associated with lower serum VTDB levels in both the UK and NHLBI cohorts,  $p<0.0001$  and  $p=0.0018$ , respectively, panels e and f).
